# Supplementary material for: Calreticulin is a Critical Cell Survival Factor in Malignant Neoplasms
Source: PubMed Central journal article supplement (PMC6768457; doi:10.1371/journal.pbio.3000402), 2019-09-30
Supplement: pbio.3000402.s006.pdf [file pbio.3000402.s006.pdf]

## qRT-PCR primer sequences

| Gene                                                    | Gene symbol | Sequence (5' à 3')     |
|---------------------------------------------------------|-------------|------------------------|
| Calreticulin (NM_004343.3)                              | CRT         | Forward                |
|                                                         |             | AGGATGATGAGTTTACACAC   |
|                                                         |             | Reverse                |
|                                                         |             | TCATCGATCTTGGCCCGCTC   |
| BCL2 binding component 3 (NM_001127240.2)               | PUMA        | Forward                |
|                                                         |             | GACCTCAACGCACAGTACGAG  |
|                                                         |             | Reverse                |
|                                                         |             | AGGAGTCCCATGATGAGATTGT |
| BCL2 associated X, apoptosis regulator (NM_001291428.1) | BAX         | Forward                |
|                                                         |             | CCCGAGAGGTCTTTTCCGAG   |
|                                                         |             | Reverse                |
|                                                         |             | CCAGCCCATGATGGTTCTGAT  |
| 18S ribosomal RNA                                       | 18S rRNA    | Forward                |
|                                                         |             | GCCCGAAGCGTTTACTTTGA   |
|                                                         |             | Reverse                |
|                                                         |             | TCCATTATTCCTAGCTGCGGT  |
